# Supplementary material for: The Association of Body Mass Index and Fat Mass with Health-Related Physical Fitness among Chinese Schoolchildren: A Study Using a Predictive Model
Source: MDPI journal article supplement (doi:10.3390/ijerph20010355), 2022-12-26
Supplement: s1 [file s1]

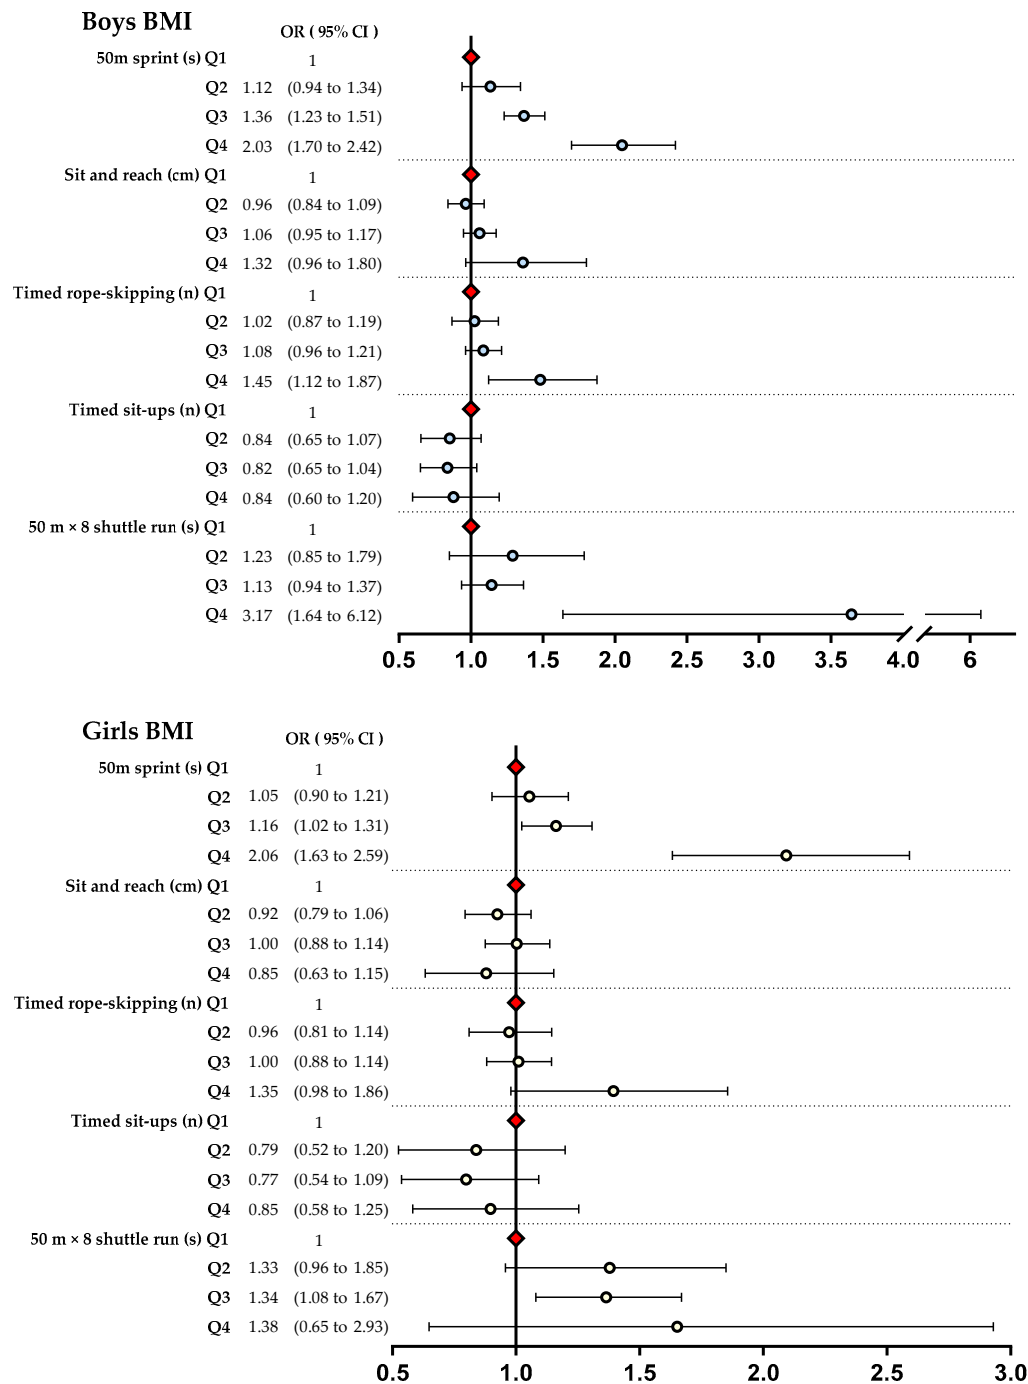

**Figure S1.** Logistic regression of the association between BMI and health-related physical fitness in Chinese schoolchildren. Q1: 90.0 points or higher, Q2: 80.0–89.9, Q3: 60.0–79.9, Q4: <60. FM, fat mass.
